1 **Prophage exotoxins enhance colonization fitness in epidemic scarlet fever-causing**  
2 ***Streptococcus pyogenes***

3

4 Stephan Brouwer<sup>1,#</sup>, Timothy C. Barnett<sup>1,2,#</sup>, Diane Ly<sup>3,4</sup>, Katherine J. Kasper<sup>5</sup>, David M.P. De  
5 Oliveira<sup>1</sup>, Tania Rivera-Hernandez<sup>1</sup>, Amanda J. Cork<sup>1</sup>, Liam McIntyre<sup>6</sup>, Magnus G. Jespersen<sup>6</sup>,  
6 Johanna Richter<sup>1</sup>, Benjamin L. Schulz<sup>1</sup>, Gordon Dougan<sup>7,8</sup>, Victor Nizet<sup>9</sup>, Kwok-Yung  
7 Yuen<sup>10,11,12</sup>, Yuanhai You<sup>13</sup>, John K. McCormick<sup>5,14,+</sup>, Martina L. Sanderson-Smith<sup>3,4,+</sup>, Mark  
8 R. Davies<sup>1,6,+</sup>, Mark J. Walker<sup>1,\*,+</sup>

9

10 <sup>1</sup>Australian Infectious Diseases Research Centre and School of Chemistry and Molecular  
11 Biosciences, The University of Queensland, St Lucia, Australia; <sup>2</sup>Wesfarmers Centre for  
12 Vaccines and Infectious Diseases, Telethon Kids Institute, University of Western Australia,  
13 Nedlands, WA, Australia; <sup>3</sup>Illawarra Health and Medical Research Institute, Wollongong,  
14 Australia; <sup>4</sup>Molecular Horizons and School of Chemistry and Molecular Bioscience, University  
15 of Wollongong, Wollongong, Australia; <sup>5</sup>Department of Microbiology and Immunology and  
16 the Centre for Human Immunology, Schulich School of Medicine & Dentistry, Western  
17 University, London, Ontario, Canada; <sup>6</sup>Department of Microbiology and Immunology at the  
18 Peter Doherty Institute for Infection and Immunity, The University of Melbourne, Melbourne,  
19 VIC, Australia; <sup>7</sup>The Wellcome Trust Sanger Institute, Hinxton, Cambridge, United Kingdom;  
20 <sup>8</sup>Department of Medicine, University of Cambridge, Cambridge, UK; <sup>9</sup>Department of  
21 Pediatrics, University of California San Diego, La Jolla, CA, USA; <sup>10</sup>Department of  
22 Microbiology, <sup>11</sup>Research Centre of Infection and Immunology, <sup>12</sup>State Key Laboratory for  
23 Emerging Infectious Diseases, The University of Hong Kong, Hong Kong Special  
24 Administrative Region, China; <sup>13</sup>State Key Laboratory for Infectious Disease Prevention and  
25 Control, Collaborative Innovation Centre for Diagnosis and Treatment of Infectious Diseases,

26 National Institute for Communicable Disease Control and Prevention, Chinese Centre for  
27 Disease Control and Prevention, Beijing, 102206, China; <sup>14</sup>Lawson Health Research Institute,  
28 London, Ontario, Canada.

29

30 \*Corresponding author: Professor Mark J. Walker, School of Chemistry and Molecular  
31 Biosciences, The University of Queensland, Cooper Road, St. Lucia, QLD, 4072, Australia.  
32 Tel: 0061-7-3346 1623; Fax: 0061-7-3365 4273; E-mail: mark.walker@uq.edu.au

33

34 #Contributed equally to this work

35 +Contributed equally to this work

36 **Abstract** (164 words)

37

38 The re-emergence of scarlet fever poses a new global public health threat. The capacity of  
39 North-East Asian serotype M12 (*emm12*) *Streptococcus pyogenes* (group A *Streptococcus*,  
40 GAS) to cause scarlet fever has been linked epidemiologically to the presence of novel  
41 prophages, including prophage  $\Phi$ HKU.vir encoding the secreted superantigens SSA and SpeC  
42 and the DNase Spd1. Here we report the comprehensive molecular characterization of  
43  $\Phi$ HKU.vir-encoded exotoxins. We demonstrate that streptolysin O (SLO)-induced glutathione  
44 efflux from host cellular stores is a previously unappreciated GAS virulence mechanism that  
45 promotes SSA release and activity, representing the first description of a thiol-activated  
46 bacterial superantigen. Spd1 is required for optimal growth in human blood, confers resistance  
47 to neutrophil killing, and degrades neutrophil extracellular traps (NETs). Investigating single,  
48 double and triple isogenic knockout mutants of the  $\Phi$ HKU.vir-encoded exotoxins, we find that  
49 SpeC and Spd1 act synergistically to facilitate nasopharyngeal colonization in a mouse model.  
50 These results offer insight into the etiology and pathogenesis of scarlet fever-causing GAS  
51 mediated by phage  $\Phi$ HKU.vir exotoxins.

## 52 **Introduction**

53

54 Scarlet fever is a superantigen-mediated acute infectious disease caused by the human-adapted  
55 pathogen group A *Streptococcus* (GAS). Scarlet fever was a leading cause of death in children  
56 in the early 1900s, but its incidence steadily declined during the 20th century<sup>1,2</sup>. Large regional  
57 outbreaks of scarlet fever re-emerged in North-East Asia in 2011, and the United Kingdom in  
58 2014<sup>3-10</sup>, with factors driving disease resurgence remaining a mystery. Alarmingly, recent  
59 studies report GAS outbreak strains in other countries<sup>11-13</sup>, heightening the need for global  
60 surveillance<sup>14</sup>.

61

62 Potential triggers for these new scarlet fever epidemics remain unclear, but accumulating  
63 epidemiological evidence indicates that novel prophages and antibiotic resistance elements  
64 have played a significant role in the evolution, virulence and diversification of scarlet fever  
65 causing GAS strains in North-East Asia<sup>4,15-17</sup>. Detailed phylogenetic analyses of GAS outbreak  
66 isolates from mainland China and Hong Kong prove that the increase in scarlet fever cases was  
67 neither *emm*-type specific nor caused by the spread of a single scarlet fever producing clone.  
68 Instead, multiclonal scarlet fever outbreak strains are commonly associated with the acquisition  
69 of related exotoxin-carrying mobile genetic elements<sup>15,17</sup>. Prophages encoding combinations  
70 of the streptococcal superantigens SSA and SpeC, and the DNase Spd1, appear to play an  
71 important role in the evolutionary pathway that lead to the emergence of more virulent strains,  
72 particularly in North-East Asia<sup>4-6,15-18</sup>. However, robust evidence defining the mechanistic  
73 contribution of prophage-encoded exotoxins to the pathogenesis of scarlet fever is lacking. A  
74 universal feature of superantigens is their ability to cross-link major histocompatibility  
75 complex II molecules on antigen-presenting cells and the variable region of the  $\beta$ -chain of T  
76 cell receptor (TCR). This cross-linkage results in TCR V $\beta$ -specific activation of large

77 populations of human T cells, without prior antigen processing, rendering superantigens the  
78 most potent T cell mitogens known to date<sup>19</sup>. Recent studies suggest that such T cell activation  
79 contributes to the establishment of GAS infection at mucosal surfaces<sup>20,21</sup>. Here, we investigate  
80 the regulation of  $\Phi$ HKU.vir encoded exotoxin genes *ssa*, *speC* and *spd1*, and their impact on  
81 the virulence of scarlet fever-causing GAS. Exotoxin-driven enhanced colonization provides  
82 an evidence-based hypothesis for the reemergence of scarlet fever globally.

83

## 84 **Results**

85

### 86 **Regulation of $\Phi$ HKU.vir exotoxins**

87 The majority of GAS *emm12* clones from scarlet fever outbreaks in North-East Asia carry  
88 superantigens SSA and SpeC and the DNase Spd1, as well as integrative and conjugative  
89 elements (ICE) encoding tetracycline (*tetM*) and macrolide (*ermB*) resistance<sup>4,15,17</sup>. Penicillin  
90 remains the treatment of choice for GAS pharyngitis. However, in many countries macrolides  
91 are commonly used as first-line therapy for upper respiratory tract infections in primary health-  
92 care settings<sup>22</sup>. To investigate whether antibiotic treatment stress affects either prophage  
93 induction or superantigen expression, macrolide-resistant GAS *emm12* scarlet fever isolate  
94 HKU16 harboring  $\Phi$ HKU.vir and ICE-*emm12* was grown in THY medium containing  
95 erythromycin (2  $\mu$ g/ml), the recommended drug in patients with penicillin hypersensitivity<sup>23</sup>.  
96 RNA-seq analysis showed that erythromycin treatment did not affect the gene expression  
97 pattern of  $\Phi$ HKU.vir (Fig. 1a), whereas expression of ICE-*emm12*-encoded *ermB* gene was  
98 significantly increased (supplementary Fig. S1). Mitomycin C, a DNA-damaging agent known  
99 to induce GAS prophage<sup>24</sup>, effectively induced  $\Phi$ HKU.vir housekeeping and structural gene  
100 expression (Fig. 1a, supplementary Fig. S1). Similar to prophage-encoded virulence factor

101 cargo genes in *emm3* GAS<sup>24</sup>, mitomycin C did not induce expression of the virulence cargo  
102 genes *ssa*, *speC* and *spd1*, pointing to differential control of exotoxin expression in  $\Phi$ HKU.vir.  
103

#### 104 **Thiol-mediated induction of SSA release**

105 While there is good evidence that phage-associated exotoxins SpeC and Spd1 are induced  
106 during host-pathogen interactions<sup>25,26</sup>, comparatively less is known about the control of SSA  
107 expression. The *ssa* gene is frequently associated with scarlet fever isolates from North-East  
108 Asia<sup>15,17</sup>. As SSA production is detectable upon growth in a chemically-defined medium<sup>16</sup>, we  
109 undertook a limited small molecule screen that identified cysteine, but not any other amino  
110 acid, as a factor specifically increasing abundance of the exotoxin SSA in culture supernatants  
111 (Fig. 1b, supplementary Fig. S2). Cysteine is uniquely chemically reactive, due to its thiol-  
112 containing side chain. We therefore examined whether SSA production was subject to thiol-  
113 mediated regulation. Both dithiothreitol (DTT) and the reduced form of glutathione (GSH)  
114 increased SSA production in GAS culture supernatants (Fig. 1b). In contrast, oxidized  
115 glutathione (GSSG) did not enhance SSA levels. Higher SSA production was also detected in  
116 GAS cultures treated with thiol-free reducing agent tris(2-carboxyethyl)phosphine (TCEP),  
117 suggesting that exposure to reducing conditions enhances SSA production. The levels of  
118 secreted SpeC and Spd1 were unaffected by any of these treatments (Fig. 1b). Quantitative  
119 real-time PCR of the *ssa* and *speC* transcripts suggested that reducing agents are acting as post-  
120 transcriptional enhancers of SSA release (Fig. 1c). To validate the requirement for thiols  
121 (reducing conditions) in SSA regulation, we also performed alkylation of cysteine with  
122 acrylamide prior to treatment, resulting in significant reduction of SSA, but not SpeC, release  
123 (supplementary Fig. S3a).

124

#### 125 **SSA is a thiol-activated superantigen**

126 SSA contains a surface-exposed Cys-26 residue that, based on the crystal structure of the  
127 homologous SpeA superantigen in complex with TCR V $\beta$ <sup>27</sup>, is predicted to lie within the TCR  
128 binding interface (supplementary Fig. S3b). Prior site-directed mutagenesis has revealed a role  
129 for Cys-26 in the mitogenic activity of SSA on human T cells by preventing disulphide-linked  
130 dimer formation between the surface-exposed Cys-26 residues of SSA<sup>28</sup>. Although a SSA  
131 dimer was not detectable in HKU16 culture supernatants (supplementary Fig. S3c), we detected  
132 dimer formation by purified recombinant SSA (supplementary Fig. S3d) which led us to  
133 investigate possible redox sensitivity of SSA activity. GSH, the major low-molecular-weight  
134 thiol in living cells, markedly increased the mitogenic potency of recombinant SSA on human  
135 T cells by ~10-fold as assessed by enhanced IL-2 production (Fig. 1d). However, thiol  
136 activation by GSH was absent in SSA carrying a cysteine-to-serine substitution at position 26  
137 (SSA<sub>C26S</sub>), underscoring a critical role for the Cys-26 residue in thiol-mediated activation. In  
138 contrast to SSA, the activity of SpeC, one of the most potent T cell mitogens<sup>29</sup>, was unaffected  
139 by GSH treatment (Fig. 1d). These data establish a unique role for thiols in SSA regulation and  
140 support a model where reducing agents not only increase levels of extracellular SSA monomer,  
141 but also directly enhance SSA-mediated T cell stimulation. To our knowledge, this is the first  
142 report of a thiol-activated superantigen.

143

#### 144 **Streptolysin O (SLO) mediates the rapid release of host intracellular glutathione**

145 Like other species of pathogenic Gram-positive bacteria, GAS produces a cholesterol-  
146 dependent cytolysin (CDC), streptolysin O (SLO), that perforates host cell membranes<sup>30</sup>. In  
147 contrast to plasma and other extracellular fluids that are low in thiol-based antioxidants, the  
148 cytosol of mammalian cells is a highly reducing compartment where thiols are present at high  
149 concentration. The most abundant non-protein thiol in mammalian cells is GSH, with  
150 intracellular concentrations typically in the millimolar range (~1-11 mM), compared to

151 extracellular concentrations in the low micromolar range<sup>31</sup>. This GSH concentration  
152 differential across the plasma membrane led us to speculate that host cell lysis by SLO, itself  
153 subject to thiol activation<sup>32</sup>, could provide extracellular GAS with access to the intracellular  
154 GSH pool, altering the redox environment and supporting SSA activation.

155

156 To test this hypothesis, we first quantified glutathione release after treatment of whole human  
157 blood with increasing concentrations of purified SLO. SLO lysed red blood cells (Fig. 2a), and  
158 both haemoglobin and total glutathione (GSH + GSSG) accumulated rapidly in plasma in a  
159 dose-dependent manner (Fig. 2a). In the context of live GAS, wildtype (WT) scarlet fever-  
160 associated strain HKU16 caused significant red blood cell hemolysis after 4 h growth in human  
161 blood (Fig. 2b), paralleled by a significant and substantial release of glutathione into plasma  
162 (Fig. 2c). In contrast, an isogenic GAS HKU16 $\Delta$ slo mutant did not induce hemolysis and  
163 plasma levels of glutathione were unchanged (Fig. 2b, c).

164

165 GAS serotype M12 strains belong to *emm* pattern A–C and have been designated as “throat  
166 specialists”<sup>33</sup>. In this context, we used human pharyngeal cells (Detroit 562; D562) to study  
167 the effect of SLO-induced pore formation on glutathione release as a pharyngitis-relevant  
168 cellular model. Lactate-dehydrogenase (LDH) release into the media serves as a marker of host  
169 cell membrane integrity. As expected, SLO caused a dose-dependent release of LDH of ~ 50%  
170 at 6.25  $\mu$ g/ml, confirming disruption of the cell membrane structure (Fig. 2d). Dose-dependent  
171 cell death following SLO exposure was again associated with a progressive increase in  
172 glutathione level in the media (Fig. 2d), indicating that SLO-induced membrane disruption was  
173 sufficient to trigger extracellular release of host cytosolic glutathione stores. Next, levels of  
174 LDH and glutathione released by D562 cells following infection with live GAS (multiplicity  
175 of infection = 20 bacterial colony forming units:cell) were measured. At 2 h post-infection,



176 WT GAS HKU16 but not the HKU16 $\Delta$ *slo* mutant induced a significant increase in levels of  
177 secreted LDH and glutathione (Fig. 2e, f). The addition of purified pore-forming protein toxin  
178 SLO (6.25  $\mu$ g/ml) to D562 cells grown in the presence of HKU16 $\Delta$ *slo* markedly elevated  
179 extracellular LDH and glutathione to WT HKU16 levels during co-culture. To examine  
180 whether the lack of glutathione release following infection with HKU16 $\Delta$ *slo* (Fig. 2f) might  
181 impact other aspects of GAS biology, we measured growth in cell-free medium with and  
182 without glutathione supplementation. Supplementation with glutathione strongly promoted  
183 growth of WT GAS HKU16 in cell-free medium (Fig. 2g), showing that host-derived  
184 glutathione is utilized by GAS for other physiological pathways. Taken together, our data  
185 demonstrate that SLO is highly effective at triggering the release of significant amounts of  
186 glutathione from host cells, which is utilized for extracellular growth of GAS and likely  
187 provides a reducing extracellular microenvironment required for efficient SSA activation *in*  
188 *vivo*.

189

### 190 $\Phi$ HKU.vir-encoded DNase Spd1 enhances fitness of HKU16 in human blood and 191 promotes resistance to neutrophil killing

192 Horizontal transmission of bacteriophage encoding DNase Sda1/SdaD2 has played a critical  
193 role in the emergence and global dissemination of the highly virulent MIT1 clone<sup>34-36</sup>. The  
194 phage-encoded DNase Spd1 is linked with the expansion of scarlet fever GAS in North-East  
195 Asia<sup>15</sup>. In contrast to Sda1<sup>36</sup>, the contribution of Spd1 to GAS pathogenesis remains largely  
196 unexplored, although this nuclease has previously been shown to play a role in nasal shedding  
197 in *emm3* GAS<sup>37</sup>.

198

199 Unlike the knockout strains HKU16 $\Delta$ *ssa* and HKU16 $\Delta$ *speC*, DNase knockout strain  
200 HKU16 $\Delta$ *spd1* showed significantly attenuated growth in human blood (Fig. 3a). Reinforcing

201 these results, complementation of HKU16 $\Delta$ *spd1* with the WT *spd1* gene (HKU16 $\Delta$ *spd1*<sup>++</sup>)  
202 fully restored growth in human blood (Fig. 3a). Neutrophils are the first immune cell  
203 responders to sites of bacterial infection, and thus play a critical role in controlling GAS  
204 infection. Examining the role of Spd1 in bacterial susceptibility to human neutrophil killing,  
205 knockout strain HKU16 $\Delta$ *spd1* showed significantly reduced survival compared to the WT and  
206 complemented HKU16 strains (Fig. 3b). Formation of web-like lattices composed of chromatin  
207 and granular proteins, known as neutrophil extracellular traps (NETs), is a well-established  
208 antimicrobial mechanism<sup>38</sup>. Multiple pathogenic microorganisms, including GAS, secrete  
209 DNases to dissolve NETs and escape neutrophil mediated killing<sup>39</sup>. To determine the ability of  
210 Spd1 to facilitate NET degradation, we used phorbol-myristate acetate (PMA) to induce high  
211 levels of NETs from freshly isolated human neutrophils (Fig. 3c) that are sensitive to bovine  
212 pancreatic DNase I (Fig. 3c, d). We then incubated PMA-stimulated neutrophils with GFP-  
213 expressing GAS for 30 min. NETs exposed to HKU16 $\Delta$ *spd1* remained intact and covered a  
214 significantly greater area in the absence of Spd1 ( $64.1 \pm 3.3$  %) compared to NETs infected  
215 with WT HKU16 ( $24.5 \pm 4.1$  %) and HKU16 $\Delta$ *spd1*<sup>++</sup> ( $21.9 \pm 5.2$  %) (Fig. 3e, f). Additionally,  
216 higher numbers of HKU16 $\Delta$ *spd1* bacteria were immobilized within NETS compared to WT  
217 HKU16 and HKU16 $\Delta$ *spd1*<sup>++</sup>, while similar levels of NET degradation were displayed by WT  
218 HKU16 and HKU16 $\Delta$ *spd1*<sup>++</sup> (Fig. 3e, f). These findings demonstrate that Spd1 promotes  
219 growth of HKU16 in whole blood, reduces susceptibility to neutrophil mediated killing and  
220 facilitates NET degradation.

221

## 222 **Role for $\phi$ HKU.vir-encoded exotoxins in pharyngeal colonization**

223 Previous studies have shown that intranasal infection of mice with GAS can serve as a model  
224 to study pharyngeal infection in humans<sup>20,21,40,41</sup>. Humanized mice that express HLA-DR4 and  
225 HLA-DQ8 are susceptible to acute nasopharyngeal infection by SpeA-carrying *emm18*

226 GAS<sup>20,21</sup>. To evaluate the role of HKU16 exotoxins in nasopharyngeal infection, we  
227 investigated the ability of WT and isogenic mutants to colonize the nasopharynx of HLA-B6  
228 mice transgenic for human CD4 and HLA-DR4-DQ8 genes<sup>42</sup>. The growth phenotype of all  
229 single, double and triple HKU16 isogenic knockout mutants (Fig. 4a) was indistinguishable  
230 from the parental WT strain (Fig. 4b) and all mutant strains were defective for production of  
231 the targeted exotoxins SSA, SpeC, Spd1 and SLO (Fig. c). HLA-B6 mice were infected  
232 intranasally with WT HKU16 or isogenic mutants. At 48 h post-infection, significantly fewer  
233 bacterial colony forming units (CFUs) were recovered from the complete nasal turbinates of  
234 mice infected with HKU16 $\Delta$ *speC/spd1* compared to WT HKU16 (Fig. 4d). Single isogenic  
235 mutant strains of  $\Phi$ HKU.vir-encoded exotoxins did not show reduced colonization efficiency,  
236 suggesting that SpeC and Spd1 act synergistically to enhance nasopharyngeal infection, nor  
237 did the additional knockout of the *ssa* gene in the triple mutant strain HKU16 $\Delta$ *ssa/speC/spd1*  
238 further reduce colonization. The attenuated virulence phenotype of HKU16 $\Delta$ *ssa/speC/spd1*  
239 could be fully restored by genetic complementation with WT *ssa*, *speC* and *spd1* genes  
240 (HKU16 $\Delta$ *ssa/speC/spd1*<sup>+</sup>) (Fig. 4d). Significantly fewer bacterial CFUs were also recovered  
241 from HKU16 $\Delta$ *slo* infected mice (Fig. 4d), confirming the importance of SLO for GAS  
242 pathogenicity as demonstrated in previous studies<sup>43-45</sup>.

## 243 Discussion

244

245 Mainland China and Hong Kong have witnessed an ongoing outbreak of scarlet fever with  
246 ~500,000 reported cases since 2011<sup>4,14,15,17,46-49</sup>. Alarming, case numbers have again  
247 significantly increased in recent years posing a heightened global threat to public health  
248 (supplementary Fig. S4)<sup>12</sup>. Previous epidemiological surveillance studies have shown that  
249 *emm12* is the most prevalent GAS *emm* genotype in clinical cases of scarlet fever in this  
250 region<sup>4,15,17</sup>. In contrast with the United Kingdom epidemic, the expansion of scarlet fever–  
251 associated *emm12* lineages in North-East Asia has been directly linked to acquisition of two  
252 genetic elements: the *tetM*- and *ermB*-carrying multidrug resistance element ICE-*emm12* (and  
253 its derivatives) and the prophage  $\Phi$ HKU.vir, encoding SSA, SpeC and the DNase Spd1<sup>4,15,50</sup>.  
254 Consistent with these prior studies, the results presented here demonstrate a direct contribution  
255 of  $\Phi$ HKU.vir acquisition to virulence phenotypes of the scarlet fever-causing *emm12* reference  
256 strain HKU16. Using defined genetic knockouts, our data suggest that SpeC and the DNase  
257 Spd1 function synergistically to mediate nasopharyngeal colonization, offering an explanation  
258 as to why these genes form a conserved genetic module in a variety of distinct GAS prophage<sup>26</sup>.  
259

260 We also present new insight into the activation of the scarlet fever-associated superantigen  
261 SSA, which we reveal as a thiol-activated superantigen. By providing a mechanistic framework  
262 of how extracellular GAS gains access to highly abundant intracellular glutathione *in vivo*, we  
263 highlight the relationship between SLO-mediated membrane disruption and SSA activity (Fig.  
264 5). Data presented here extend previous studies showing that epithelial cell damage by SLO  
265 augments superantigen penetration, which allows for better interaction of superantigens with  
266 antigen presenting cells in underlying tissues<sup>51</sup>. Together, these studies suggest that SLO pore

267 formation promotes SSA activation, which may be an important driver in diseases associated  
268 with superantigen production, including scarlet fever.

269

270 GAS encodes several glutathione-dependent proteins, yet the bacterium lacks genes for *de novo*  
271 glutathione synthesis. This paradox raises the possibility that GAS may coordinate a range of  
272 virulence factors through SLO-mediated GSH release. One such factor is glutathione  
273 peroxidase (GpoA)<sup>52</sup>, which plays a role in the adaptation of GAS to oxidative stress during  
274 inflammation following systemic infection<sup>53</sup>. Microbial acquisition of nutrients *in vivo* is a  
275 fundamental aspect of infectious disease pathogenesis, and intracellular bacterial pathogens  
276 capitalize on the ubiquitous and highly abundant cytosolic antioxidant GSH<sup>54,55</sup>. Our data  
277 support a hypothesis in which extracellular bacterial pathogens such as GAS may have evolved  
278 a mechanism to target and hijack host cytosolic glutathione, consistent with the absence of  
279 glutathione biosynthetic genes in the GAS genome. While a precise role for SSA in virulence  
280 was not conclusively established in the HLA-B6 mouse model, this work exemplifies an  
281 interconnected action of GAS virulence determinants such as SLO and SSA, opening new  
282 avenues to understand the evolution and emergence of pathogenic clones. As multiple bacterial  
283 pathogens encode functional homologs of SLO<sup>30</sup>, glutathione release by cholesterol-dependent  
284 cytolysins may constitute a generalized mechanism used by pathogenic bacteria to modulate  
285 their physiological response to host cells, including through the post-transcriptional activation  
286 of virulence-associated proteins.

287

288 Our findings show that GAS HKU16 requires the  $\Phi$ HKU.vir-encoded exotoxins SpeC and  
289 Spd1, and SLO, to efficiently colonize the HLA-B6 mouse model. We hypothesise that  
290 prophage-encoded exotoxin acquisition has enhanced colonization fitness of scarlet fever-  
291 causing GAS *emm12* clones in North-East Asia. The atypical presence of genes encoding

292 superantigens such as SSA in *emm12* isolates<sup>56</sup> could provide a framework allowing for clonal  
293 expansion of GAS in a naïve population. The spread of such prophage-containing GAS is  
294 therefore of great public health concern and heightened efforts are needed to instigate global  
295 surveillance systems. Recent evidence of interspecies transfer of *speC*- and *spd1*-containing  
296 prophage in the US should serve as a warning for the dissemination of these virulence-  
297 enhancing genes into other pathogenic streptococci<sup>57</sup>.

298

### 299 **Acknowledgments**

300 We kindly acknowledge James McCluskey (University of Melbourne, Melbourne, Australia)  
301 for providing HLA-B6 mice transgenic for human CD4 and HLA-DR4-DQ8 genes; Luke  
302 McAlary (University of Wollongong, Wollongong, Australia) for assistance with microscopy;  
303 and assistance from the sequencing and pathogen informatics core teams at The Wellcome  
304 Trust Sanger Institute (Hinxton, UK). We thank Thomas Proft, Mitchell Acev, Heema Vyas  
305 and Jason McArthur for providing genetic constructs. This work was supported by grants from  
306 the National Health and Medical Research Council of Australia, The Wellcome Trust, UK, the  
307 National Institutes of Health, USA, and the Canadian Institutes of Health Research.

308

### 309 **Author contributions**

310 SB, TCB, GD, VN, KYY, YY, JKM, MLSS, MRD and MJW conceived this study. SB, TCB,  
311 DL, KJK, BLS, GD, VN, KYY, YY, JKM, MLSS, MRD and MJW planned experiments. SB,  
312 TCB, DL, KJK, LM, MGJ, DMPDO, TRH, AJC, JR and MRD performed experiments. GD,  
313 VN, KYY and JKM provided essential reagents and strains. SB and MJW wrote the manuscript  
314 and all authors reviewed and revised the manuscript.

315

## 316 **Methods**

317

### 318 **Bacterial strains, growth conditions and construction of HKU16 mutant strains**

319 The *emm12* GAS scarlet fever isolate HKU16<sup>4</sup> and isogenic derivatives were routinely grown  
320 at 37°C on 5% horse blood agar or statically in Todd-Hewitt broth supplemented with 1% yeast  
321 extract (THY) or chemically defined medium (CDM; Gibco RPMI 1640 with L-glutamine and  
322 phenol red (Life Technologies; 11875-093) supplemented with 0.7% (w/v) D-Glucose, 1%  
323 (v/v) BME vitamins (Sigma; B6891), 0.15 mM nucleobases (adenine, guanine, and uracil),  
324 and 0.02 mM HEPES, pH 7.4). To facilitate fluorescent microscopy experiments, GAS strains  
325 were transformed with GFP-expressing plasmid pLZ12Km2-P23R-TA:GFP (supplementary  
326 information). *Escherichia coli* (*E. coli*) strains MC1061 or XL1-blue, and BL21(DE3), were  
327 used for cloning and protein expression, respectively. *E. coli* was grown in Luria-Bertani  
328 medium (LB). Where required, spectinomycin was used at 100 µg/ml (both GAS and *E. coli*),  
329 ampicillin was used at 100 µg/ml (*E. coli*), and kanamycin was used at 50 µg/ml (*E. coli*). All  
330 bacterial strains and plasmids are listed in Table S1. Isogenic HKU16 mutants were generated  
331 using a highly-efficient plasmid (pLZts) for creating markerless isogenic mutants<sup>58</sup>. All PCR  
332 primer sequences are provided in Table S1. All gene deletions were confirmed by DNA  
333 sequence analysis (Australian Equine Genome Research Centre, University of Queensland,  
334 Brisbane, Australia). To examine fitness of WT and mutant strains, GAS were firstly grown  
335 overnight on horse blood agar. GAS were then inoculated into CDM to an optical density at  
336 600 nm (OD<sub>600</sub>) of 0.01. Late-exponential phase GAS grown in CDM (OD<sub>600</sub> of 0.4) were  
337 resuspended in ATCC Eagle's Minimum Essential Medium (EMEM; ATCC302003)  
338 supplemented with 10% heat-inactivated fetal bovine serum (FBS). Bacteria were then  
339 inoculated into 96-well microtiter plates and the growth curves measured using the FLUOstar  
340 Omega Microplate Reader (BMG Labtech) at 37°C.

341

## 342 **Transcriptomic analysis and quantitative gene expression studies**

343 Total RNA was routinely isolated from bacterial cells as follows. Two volumes of RNAprotect  
344 (Qiagen) was added to the cultures, and bacterial cells were collected by centrifugation at  
345  $5,000 \times g$  for 25 min at 4°C. The dry cell pellet was stored at  $-80^{\circ}\text{C}$  overnight. Total RNA was  
346 extracted using the RNeasy minikit (Qiagen) with an additional mechanical lysis step using  
347 lysing matrix B tubes (MP Biomedicals). RNA samples were treated with Turbo DNase  
348 (Ambion) to eliminate contaminating genomic DNA and quantified using a NanoDrop  
349 instrument (Thermo Scientific). One microgram of RNA was converted to cDNA using the  
350 SuperScript VILO cDNA synthesis kit (Invitrogen). Resulting cDNA libraries were used for  
351 downstream analyses. RNA sequencing samples were taken from bacterial cultures grown in  
352 THY to late-exponential growth phase (OD600 of  $\sim 0.7$ - $0.8$ ). Erythromycin was used at a  
353 concentration of 2  $\mu\text{g}/\text{ml}$ . Mitomycin C was added to early-exponential cultures (OD600 of  
354 0.25) at a concentration of 0.2  $\mu\text{g}/\text{ml}$ . RNA-sequencing was performed from Ribo-zero (rRNA  
355 depleted) Illumina libraries on a single Illumina HiSeq 2500 lane using v4 chemistry from 75  
356 base pair paired-end reads. Reads were mapped to the HKU16 reference genome (alternatively  
357 termed HKU QMH11M0907901, GenBank accession number NZ\_AFRY01000001) with  
358 BWA MEM (version 0.7.16). Relative read counts (per gene) and differential gene expression  
359 was determined using DESeq2<sup>59</sup> (v. 1.26.0) in R (v. 3.6.0). Genes with less than 10 reads across  
360 all conditions and samples were removed. P-values were calculated using Wald test and  
361 adjusted for multiple testing using Benjamini-Hichberg/false discovery rate. Read counts were  
362 visualized using the Integrative Genomics Viewer (IGV) and volcano plots were constructed  
363 using ggplot2 (v.3.2.1). To quantify gene expression, total RNA was isolated from bacterial  
364 cells harvested at late-exponential growth phase (OD600 of 0.4) in CDM grown in the presence  
365 or absence of 2 mM redox-active compounds (L-Cysteine (Cys), dithiothreitol (DTT), reduced



366 glutathione (GSH), oxidized glutathione (GSSG), and tris(2-carboxyethyl)phosphine (TCEP).  
367 Reverse transcription-PCR (RT-PCR) was performed using the primers specified in Table S1,  
368 using SYBR green master mix (Applied Biosystems) according to the manufacturer's  
369 instructions. All data were analyzed using ViiA7 software (Applied Biosystems). Relative gene  
370 expression was calculated using the threshold cycle ( $2^{-\Delta\Delta CT}$ ) method with *gyrA* as the reference  
371 housekeeping gene<sup>60</sup>. All reactions were performed in triplicate from 3 independently isolated  
372 RNA samples.

373

#### 374 **Purification of streptococcal antigens and polyclonal antiserum production**

375 The gene encoding for the DNase Spd1, including nucleotides encoding the predicted signal  
376 peptide, was PCR amplified from genomic DNA of HKU16 and cloned into *NdeI* and *HindIII*  
377 sites of pET-28a. Point mutation of the active site residue Asn145 (Asn145Ala)<sup>61</sup> was  
378 introduced using the QuikChange II site-directed mutagenesis kit (Agilent) to inactivate the  
379 Spd1 DNase (see Supplementary Table S2 for primer sequences). WT Spd1 and inactivated  
380 Spd1 were produced by 0.5 mM isopropyl  $\beta$ -D-1-thiogalactopyranoside (IPTG)-induced  
381 expression in *E. coli* BL21(DE3), purified via nickel affinity chromatography, and His<sub>6</sub> tags  
382 cleaved with His<sub>6</sub>-tagged tobacco etch virus (TEV) protease. The expression plasmids for WT  
383 SLO (pET-15b-SLO)<sup>43</sup> and inactivated SLO carrying P427L and W535A mutations (pET-15b-  
384 SLOmut)<sup>62</sup> were used to produce recombinant protein in *E. coli* BL21(DE3) following the same  
385 procedure as for Spd1. Recombinant proteins were analyzed for purity on 12% separating  
386 sodium dodecyl sulfate polyacrylamide gel electrophoresis (SDS-PAGE). Inactivated Spd1  
387 and SLO were used to raise antisera in mice. Briefly, 4 - 6 weeks old BALB/c mice (n = 10)  
388 were immunized subcutaneously on days 0, 14, 21, and 28 with 30  $\mu$ g of total protein  
389 adjuvanted with alum (Alhydrogel [2%]; Brenntag) at a 1:1 ratio. One week following the last

390 injection, mice were sacrificed and serum was collected for antibody titer analysis using  
391 ELISA.

392

### 393 **Detection of exotoxins in GAS supernatants**

394 Bacteria were routinely grown to late-exponential growth phase in CDM or THY where  
395 indicated. Filter-sterilized culture supernatants were precipitated with 10% trichloroacetic acid  
396 (TCA). TCA precipitates were resuspended in loading buffer (normalized to OD600) in the  
397 presence or absence of 100 mM DTT. Samples were boiled for 10 min, subjected to SDS-  
398 PAGE, and then transferred to polyvinylidene difluoride (PVDF) membranes for detection of  
399 immuno-reactive bands using a LI-COR Odyssey Imaging System (LI-COR Biosciences). The  
400 primary antibodies used for the detection of SpeC and SSA protein in GAS culture supernatants  
401 were rabbit antibody to SpeC (PCI333, Toxin Technology; 1:1,000 dilution) and affinity-  
402 purified rabbit antibody to SSA (produced by Mimotopes; 1:500 dilution)<sup>15</sup>. The murine  
403 primary antibody dilutions used for the detection of Spd1 and SLO were 1:1,000 and 1:2,000,  
404 respectively. Anti-rabbit IgG (H+L) (DyLight™ 800 4X PEG Conjugate, NEB) or anti-mouse  
405 IgG (H+L) (DyLight™ 800 4X PEG Conjugate, NEB) were used as the secondary antibodies.

406

### 407 **Recombinant superantigen purification**

408 The SSA gene, lacking nucleotides encoding the predicted signal peptide, was PCR amplified  
409 from the *S. pyogenes* HKU16 chromosome using primers listed in Table S1 and cloned into  
410 the *Nco*I and *Bam*HI sites of a modified pET-41a protein expression vector that encodes an  
411 engineered tobacco etch virus (TEV) protease site to remove purification tags<sup>63</sup>. The C26S  
412 mutation was introduced into the *ssa* gene as above using primers listed in Table S1. Cloning  
413 of SpeC into the pET-41a vector was carried out as previously described<sup>20</sup>. Expression of the

414 recombinant SSA and SpeC proteins was induced with 0.2 mM IPTG in *E. coli* BL21(DE3)  
415 and purified as described above.

416

#### 417 **Superantigen activity as assessed by T cell proliferation assay**

418 Human PBMCs isolated from freshly drawn heparinized venous blood from a healthy adult  
419 volunteer were resuspended in complete RPMI (cRPMI; RPMI1640, 10% FBS, 0.1 mM  
420 minimal essential media non-essential amino acids, 2 mM L-glutamine, 1 mM sodium  
421 pyruvate, 100 U/ml penicillin, 100 ug/ml streptomycin) and seeded at 200,000 cells per well  
422 in a 96-well plate. Sterile-filtered GSH dissolved in cRPMI (final concentration of 2 mM), or  
423 cRPMI alone, were added to each well 30 minutes prior to the addition of 10-fold serial  
424 dilutions of recombinant superantigens. Cells were incubated at 37°C in 5% CO<sub>2</sub> for 18 h.  
425 Spent cell culture supernatant was harvested and analyzed for human IL-2 by ELISA according  
426 to the manufacturer's instructions (eBiosciences).

427

#### 428 ***Ex vivo* whole blood model**

429 Freshly drawn heparinized venous blood from a healthy adult volunteer was aliquoted (180 µl)  
430 into wells of a 96-well plate. To validate hemolytic activity of SLO, increasing concentrations  
431 of recombinant WT SLO were added to give a final volume of 200 µl per well and incubated  
432 at 37°C for 2 h with 5% CO<sub>2</sub>. For bacterial infections, GAS strains were grown to late-  
433 exponential growth phase in CDM (OD<sub>600</sub> of 0.4), resuspended in Hanks Balanced Salt  
434 Solution (HBSS) at  $\sim 1 \times 10^8$  CFU/ml, and then added to whole blood to give a final volume  
435 of 200 µl ( $\sim 2 \times 10^6$  CFU). Growth of GAS strains was assessed 2 h post-infection by plating  
436 serial dilutions for enumeration of CFUs. Plasma samples for detection of hemolysis and  
437 glutathione release were obtained 4 h post-infection by centrifugation at  $4,800 \times g$  for 15 min

438 at 4°C. Controls included for each experiment were whole blood treated with HBSS (mock),  
439 or blood lysed with 0.1% Triton X-100.

440

#### 441 **Co-culture of *S. pyogenes* with human pharyngeal cells**

442 Human nasopharyngeal carcinoma epithelial cells Detroit 562 (D562; ATCC CCL-138, Lot  
443 70004014) were cultured at 37°C under a 5% CO<sub>2</sub>/20% O<sub>2</sub> atmosphere in EMEM  
444 supplemented with 10% FBS in tissue culture vessels (Greiner Bio-one). At 90% confluency,  
445 cells were trypsinized and handled according to manufacturer's instructions. D562 cells were  
446 utilized for experiments at passage 8 and seeded at a density of  $\sim 1.2 \times 10^5$  viable cells per well  
447 in 24-well tissue culture plates, or  $\sim 2.5 \times 10^5$  viable cells per well in 12-well plates 24 h prior  
448 to infection to allow the formation of confluent monolayers. Cells were grown at 37°C under  
449 5% CO<sub>2</sub> until they formed a confluent monolayer. Immediately prior to infection, the cell  
450 culture medium was removed, and replaced with fresh medium. Increasing concentrations of  
451 recombinant WT SLO were added to cell monolayers and incubated for 2 h. GAS strains were  
452 grown to late-exponential growth phase in CDM (OD600 of 0.4), resuspended in cell culture  
453 medium, and then added to cell monolayers at a multiplicity of infection of 20. Controls  
454 included for each experiment were cells not exposed to bacteria or SLO (mock), or cells lysed  
455 with 0.2% Triton X-100. At 2 h post-infection, plates were centrifuged at 500 × g for 5 min,  
456 then media was aspirated and stored at -80°C until further processing.

457

#### 458 **Quantitative assessment of cell death and glutathione release**

459 SLO-induced hemolysis in whole blood was determined after collecting plasma samples and  
460 diluting 1:10 in PBS. The amount of hemoglobin was measured spectrophotometrically at 405  
461 nm. D562 membrane disruption was quantified by measuring lactate dehydrogenase (LDH)  
462 release from cell supernatants, using CytoTox96 Non-Radioactive Cytotoxicity Assay

463 (Promega; G1781), as per the manufacturer's instructions. Sample absorbance was measured  
464 spectrophotometrically at 490 nm. Glutathione release was measured using the GSH-Glo  
465 glutathione assay (Promega; V6912), as per the manufacturer's instructions, with the  
466 modification of mixing undiluted samples 1:1 with 2 mM TCEP in wells of a white 96-well  
467 plate (Greiner Bio-one) prior to use. Luminescent intensity of each sample was measured using  
468 a FLUOstar Omega Microplate Reader (BMG Labtech). Sample readings were analyzed by  
469 Prism 7 software and divided by the positive control for cell lysis to give a percentage of total  
470 hemolysis and cell death (LDH) for each sample.

471

#### 472 **Neutrophil killing assay**

473 Human neutrophils were isolated from fresh heparinized whole blood using PolymorphPrep  
474 density gradient centrifugation (Axis-Shield) as per manufacturer's instructions. Following  
475 neutrophil harvest, hypotonic lysis was performed to remove residual erythrocytes. Purified  
476 neutrophils were infected with GAS at a multiplicity of infection of 10 ( $1 \times 10^6$  cells/ml  
477 neutrophils: $1 \times 10^5$  bacterial CFU/ml), centrifuged for 5 min at  $370 \times g$  to synchronize  
478 phagocytosis, and then incubated for 30 min at 37°C under 5% CO<sub>2</sub>. Control wells contained  
479 bacteria only. Infected neutrophils were then lysed and serially diluted in sterile Milli-Q water,  
480 then plated on THY agar. Following overnight incubation at 37°C, bacterial survival was  
481 calculated as the average total number of CFUs following incubation in the presence of  
482 neutrophils divided by CFUs in control wells.

483

#### 484 **NETs degradation assay**

485 Freshly isolated purified human neutrophils were seeded on 12 mm Poly-D-lysine-coated (0.01  
486 % solution overnight; Sigma-Aldrich; P7405) coverslips at a concentration of  $1 \times 10^6$  cells/ml  
487 ( $5 \times 10^5$  cells/mL per well) in a 24-well tissue culture plate. Neutrophils were stimulated with

488 25 nM phorbol 12-myristate 13-acetate (PMA) (Cayman Chemical; 10008014), centrifuged for  
489 5 min at  $370 \times g$ , and incubated for 3 h at  $37^{\circ}\text{C}$  under 5%  $\text{CO}_2$  to induce NET formation. Cell  
490 culture media was then removed, and the PMA-stimulated neutrophils were infected with  
491 fluorescent GAS strains diluted in RPMI media containing 2% heat inactivated autologous  
492 human plasma and 5 mM  $\text{MgCl}_2$  at a multiplicity of infection of 10 ( $1 \times 10^7$  bacterial CFU/ml:  
493  $1 \times 10^6$  cells/ml PMN). Infected plates were centrifuged at  $370 \times g$  for 5 min to promote cell  
494 interaction and then incubated for an additional 30 min at  $37^{\circ}\text{C}$  under 5%  $\text{CO}_2$ . Bovine pancreas  
495 DNase I at 5  $\mu\text{g}/\text{ml}$  (Sigma; D5025) was used as a positive control to confirm NET degradation,  
496 while wells containing medium was used to confirm the formation of NETs. Cells were washed  
497 once with PBS, followed by fixation with 4% paraformaldehyde for 15 min at room  
498 temperature. After two washes, cells were incubated with 1 mM SYTOX Orange Nucleic Acid  
499 Stain (Molecular Probes; S11368) for 15 min in the dark at room temperature to stain for NETs.  
500 After washing in 5% (v/v) PBS, coverslips were embedded in Fluorescent Mounting medium  
501 (Dako; S30230) on microscopic glass slides and dried overnight in the dark at room  
502 temperature. Slides were stored at  $4^{\circ}\text{C}$  until images were acquired. Samples were recorded  
503 using a Leica TCS SP8 Lightning confocal laser scanning microscope (Leica Microsystems)  
504 with a  $63 \times$  oil immersion objective. GFP and SYTOX Orange were excited with 488 and 561  
505 nm lasers, respectively, with images captured using sequential scanning. For each sample, a  
506 minimum of five randomly selected images per independent experiment performed in duplicate  
507 were acquired. For figure production, images were processed using ImageJ software (version  
508 1.8.0) and the Enhance Local Contrast function was used to improve images for better  
509 visualization. For quantification of NET DNA degradation, the cell imaging analysis software  
510 CellProfiler (version 3.1.9) was employed. The percentage area of NETs per image was  
511 calculated as the area of neutrophil nuclei subtracted from the total area stained with SYTOX  
512 Orange. Images used for NET quantification were unenhanced.

513

#### 514 **HLA-B6 murine nasopharyngeal colonization model**

515 For nasopharyngeal infection<sup>20,21</sup>, sex- and age-matched (9- to 13-week-old) transgenic  
516 C57BL/6J mice expressing human major histocompatibility complex II molecules DR4/DQ8  
517 and human CD4 (HLA-B6)<sup>42</sup> were infected with  $\sim 1 \times 10^8$  CFU per 15  $\mu$ l using 7.5  $\mu$ l to  
518 inoculate each nostril under methoxyflurane inhalation anesthetic. For infection, bacteria were  
519 cultured to late-exponential growth phase (OD600 of 0.4) in CDM supplemented with 2 mM  
520 of L-Cys, washed and concentrated in CDM. Sham-treated mice only received CDM. Mice  
521 were sacrificed 48 h post-infection, and the combined nasal turbinates, including the nasal  
522 associated lymphoid tissue and nasal turbinates, were removed. Tissue was homogenized in  
523 HBSS in lysing matrix F tubes (MP Biomedicals), serially diluted, and plated on horse blood  
524 agar for enumeration of beta-hemolytic CFUs.

525

#### 526 **Statistical analysis**

527 All statistical analysis was completed using Prism software (GraphPad). Significance was  
528 calculated using, where indicated, the Student's t test, one-way ANOVA with Dunnett's  
529 multiple comparisons post-hoc test, and the Kruskal-Wallis test with the Dunn's multiple  
530 comparisons post-hoc test. A p value less than 0.05 was determined to be statistically  
531 significant.

532

#### 533 **Accession codes**

534 Illumina read data are available on NCBI under the sample accession numbers relating to the  
535 three conditions (in triplicate): THY (ERS1091539, ERS1091548, ERS1091557); THY plus  
536 erythromycin (ERS1091542, ERS1091551, ERS1091560); THY plus mitomycin C  
537 (ERS1091545, ERS1091554, ERS1091563).

538

539 **Ethics statement**

540 The human ethics protocol for the isolation of human blood from healthy volunteers for use in  
541 T cell activation assays was approved by the Health Sciences Research Ethics Board at Western  
542 University (Ontario, Canada) (Protocol #110859). Human blood donation for use in whole  
543 blood proliferation assays, neutrophil killing assays and NET degradation assays were  
544 conducted in accordance with the Australian National statement on ethical conduct in human  
545 research<sup>64</sup>, in compliance with the regulations governing experimentation on humans, and was  
546 approved by the University of Queensland medical research ethics committee (2010001586)  
547 and the University of Wollongong Human Research Ethics Committee (HE08/250). Animal  
548 experiments were performed according to the Australian code of practice for the care and use  
549 of animals for scientific purposes. Permission was obtained from the University of Queensland  
550 ethics committee to undertake this work (SCMB/140/16/NHMRC).

551



## 552 **References**

- 553 1 Katz, A. R. & Morens, D. M. Severe streptococcal infections in historical perspective.  
554 *Clin Infect Dis* **14**, 298-307 (1992)
- 555 2 Morens, D. M., Folkers, G. K. & Fauci, A. S. The challenge of emerging and re-  
556 emerging infectious diseases. *Nature* **430**, 242-249 (2004)
- 557 3 Luk, E. Y. *et al.* Scarlet fever epidemic, Hong Kong, 2011. *Emerg Infect Dis* **18**, 1658-  
558 1661 (2012)
- 559 4 Tse, H. *et al.* Molecular characterization of the 2011 Hong Kong scarlet fever outbreak.  
560 *J Infect Dis* **206**, 341-351 (2012)
- 561 5 Turner, C. E. *et al.* Scarlet fever upsurge in England and molecular-genetic analysis in  
562 North-West London, 2014. *Emerg Infect Dis* **22**, 1075-1078 (2016)
- 563 6 Chalker, V. *et al.* Genome analysis following a national increase in scarlet fever in  
564 England 2014. *BMC Genomics* **18**, 224 (2017)
- 565 7 Park, D. W. *et al.* Incidence and characteristics of scarlet fever, South Korea, 2008-  
566 2015. *Emerg Infect Dis* **23**, 658-661 (2017)
- 567 8 Liu, Y. *et al.* Resurgence of scarlet fever in China: a 13-year population-based  
568 surveillance study. *Lancet Infect Dis* **18**, 903-912 (2018)
- 569 9 Lamagni, T. *et al.* Resurgence of scarlet fever in England, 2014-16: a population-based  
570 surveillance study. *Lancet Infect Dis* **18**, 180-187 (2018)
- 571 10 Lynskey, N. N. *et al.* Emergence of dominant toxigenic MIT1 *Streptococcus pyogenes*  
572 clone during increased scarlet fever activity in England: a population-based molecular  
573 epidemiological study. *Lancet Infect Dis* **19**, 1209-1218 (2019)
- 574 11 Yung, C. F. & Thoon, K. C. A 12 year outbreak of scarlet fever in Singapore. *Lancet*  
575 *Infect Dis* **18**, 942 (2018)

- 576 12 Walker, M. J. *et al.* Detection of epidemic scarlet fever group A *Streptococcus* in  
577 Australia. *Clin Infect Dis* **69**, 1232-1234 (2019)
- 578 13 Demczuk, W., Martin, I., Domingo, F. R., MacDonald, D. & Mulvey, M. R.  
579 Identification of *Streptococcus pyogenes* M1UK clone in Canada. *Lancet Infect Dis* **19**,  
580 1284-1285 (2019)
- 581 14 Walker, M. J. & Brouwer, S. Scarlet fever makes a comeback. *Lancet Infect Dis* **18**,  
582 128-129 (2018)
- 583 15 Davies, M. R. *et al.* Emergence of scarlet fever *Streptococcus pyogenes emm12* clones  
584 in Hong Kong is associated with toxin acquisition and multidrug resistance. *Nat Genet*  
585 **47**, 84-87 (2015)
- 586 16 Ben Zakour, N. L. *et al.* Transfer of scarlet fever-associated elements into the group A  
587 *Streptococcus* M1T1 clone. *Sci Rep* **5**, 15877 (2015)
- 588 17 You, Y. *et al.* Scarlet fever epidemic in China caused by *Streptococcus pyogenes*  
589 serotype M12: epidemiologic and molecular analysis. *EBioMedicine* **28**, 128-135  
590 (2018)
- 591 18 Silva-Costa, C., Carrico, J. A., Ramirez, M. & Melo-Cristino, J. Scarlet fever is caused  
592 by a limited number of *Streptococcus pyogenes* lineages and is associated with the  
593 exotoxin genes *ssa*, *speA* and *speC*. *Pediatr Infect Dis J* **33**, 306-310 (2014)
- 594 19 Proft, T. a. F., J.D. Streptococcal superantigens: biological properties and potential role  
595 in disease. In: Ferretti, JJ, Stevens, DL, Fischetti, VA, eds. *Streptococcus pyogenes:*  
596 *Basic Biology to Clinical Manifestations [Internet]. Oklahoma City: University of*  
597 *Oklahoma Health Sciences Center*, 445–486 (2016)
- 598 20 Kasper, K. J. *et al.* Bacterial superantigens promote acute nasopharyngeal infection by  
599 *Streptococcus pyogenes* in a human MHC Class II-dependent manner. *PLoS Pathog*  
600 **10**, e1004155-e1004155 (2014)

- 601 21 Zeppa, J. J. *et al.* Nasopharyngeal infection by *Streptococcus pyogenes* requires  
602 superantigen-responsive Vbeta-specific T cells. *Proc Natl Acad Sci U S A* **114**, 10226-  
603 10231 (2017)
- 604 22 Fossum, G. H., Lindbaek, M., Gjelstad, S., Dalen, I. & Kvaerner, K. J. Are children  
605 carrying the burden of broad-spectrum antibiotics in general practice? Prescription  
606 pattern for paediatric outpatients with respiratory tract infections in Norway. *BMJ Open*  
607 **3**, pii: e002285 (2013)
- 608 23 Bisno, A. L. Acute pharyngitis. *N Engl J Med* **344**, 205-211 (2001)
- 609 24 Banks, D. J., Lei, B. & Musser, J. M. Prophage induction and expression of prophage-  
610 encoded virulence factors in group A *Streptococcus* serotype M3 strain MGAS315.  
611 *Infect Immun* **71**, 7079-7086 (2003)
- 612 25 Broudy, T. B., Pancholi, V. & Fischetti, V. A. Induction of lysogenic bacteriophage  
613 and phage-associated toxin from group A streptococci during coculture with human  
614 pharyngeal cells. *Infect Immun* **69**, 1440-1443 (2001)
- 615 26 Broudy, T. B., Pancholi, V. & Fischetti, V. A. The *in vitro* interaction of *Streptococcus*  
616 *pyogenes* with human pharyngeal cells induces a phage-encoded extracellular DNase.  
617 *Infect Immun* **70**, 2805-2811 (2002)
- 618 27 Sundberg, E. J. *et al.* Structures of two streptococcal superantigens bound to TCR beta  
619 chains reveal diversity in the architecture of T cell signaling complexes. *Structure* **10**,  
620 687-699 (2002)
- 621 28 De Marzi, M. C. *et al.* Cloning, expression and interaction of human T-cell receptors  
622 with the bacterial superantigen SSA. *Eur J Biochem* **271**, 4075-4083 (2004)
- 623 29 Proft, T., Moffatt, S. L., Berkahn, C. J. & Fraser, J. D. Identification and  
624 characterization of novel superantigens from *Streptococcus pyogenes*. *J Exp Med* **189**,  
625 89-102 (1999)

- 626 30 Tweten, R. K. Cholesterol-dependent cytolysins, a family of versatile pore-forming  
627 toxins. *Infect Immun* **73**, 6199-6209 (2005)
- 628 31 Schafer, F. Q. & Buettner, G. R. Redox environment of the cell as viewed through the  
629 redox state of the glutathione disulfide/glutathione couple. *Free Radic Biol Med* **30**,  
630 1191-1212 (2001)
- 631 32 Alouf, J. E. Streptococcal toxins (streptolysin O, streptolysin S, erythrogenic toxin).  
632 *Pharmacol Ther* **11**, 661-717 (1980)
- 633 33 Bessen, D. E. Tissue tropisms in group A *Streptococcus*: what virulence factors  
634 distinguish pharyngitis from impetigo strains? *Curr Opin Infect Dis* **29**, 295-303 (2016)
- 635 34 Aziz, R. K. *et al.* Mosaic prophages with horizontally acquired genes account for the  
636 emergence and diversification of the globally disseminated MIT1 clone of  
637 *Streptococcus pyogenes*. *J Bacteriol* **187**, 3311-3318 (2005)
- 638 35 Sumbly, P. *et al.* Evolutionary origin and emergence of a highly successful clone of  
639 serotype M1 group A *Streptococcus* involved multiple horizontal gene transfer events.  
640 *J Infect Dis* **192**, 771-782 (2005)
- 641 36 Walker, M. J. *et al.* DNase Sda1 provides selection pressure for a switch to invasive  
642 group A streptococcal infection. *Nat Med* **13**, 981-985 (2007)
- 643 37 Afshar, B. *et al.* Enhanced nasopharyngeal infection and shedding associated with an  
644 epidemic lineage of *emm3* group A *Streptococcus*. *Virulence* **8**, 1390-1400 (2017)
- 645 38 Brinkmann, V. *et al.* Neutrophil extracellular traps kill bacteria. *Science* **303**, 1532-  
646 1535 (2004)
- 647 39 Buchanan, J. T. *et al.* DNase expression allows the pathogen group A *Streptococcus* to  
648 escape killing in neutrophil extracellular traps. *Curr Biol* **16**, 396-400 (2006)

- 649 40 Park, H. S. *et al.* Primary induction of CD4 T cell responses in nasal associated  
650 lymphoid tissue during group A streptococcal infection. *Eur J Immunol* **34**, 2843-2853  
651 (2004)
- 652 41 Wang, B. *et al.* Induction of TGF-beta1 and TGF-beta1-dependent predominant Th17  
653 differentiation by group A streptococcal infection. *Proc Natl Acad Sci U S A* **107**, 5937-  
654 5942 (2010)
- 655 42 Chen, Z. *et al.* Humanized transgenic mice expressing HLA DR4-DQ3 haplotype:  
656 reconstitution of phenotype and HLA-restricted T-cell responses. *Tissue Antigens* **68**,  
657 210-219 (2006)
- 658 43 Timmer, A. M. *et al.* Streptolysin O promotes group A *Streptococcus* immune evasion  
659 by accelerated macrophage apoptosis. *J Biol Chem* **284**, 862-871 (2009)
- 660 44 Uchiyama, S. *et al.* Streptolysin O rapidly impairs neutrophil oxidative burst and  
661 antibacterial responses to group A *Streptococcus*. *Front Immunol* **6**, 581 (2015)
- 662 45 Zhu, L. *et al.* Contribution of secreted NADase and streptolysin O to the pathogenesis  
663 of epidemic serotype M1 *Streptococcus pyogenes* infections. *Am J Pathol* **187**, 605-613  
664 (2017)
- 665 46 Hsieh, Y. C. & Huang, Y. C. Scarlet fever outbreak in Hong Kong, 2011. *J Microbiol*  
666 *Immunol Infect* **44**, 409-411 (2011)
- 667 47 Chen, M. *et al.* Outbreak of scarlet fever associated with *emm12* type group A  
668 *Streptococcus* in 2011 in Shanghai, China. *Pediatr Infect Dis J* **31**, e158-162 (2012)
- 669 48 Lau, E. H., Nishiura, H., Cowling, B. J., Ip, D. K. & Wu, J. T. Scarlet fever outbreak,  
670 Hong Kong, 2011. *Emerg Infect Dis* **18**, 1700-1702 (2012)
- 671 49 Yang, P. *et al.* Characteristics of group A *Streptococcus* strains circulating during  
672 scarlet fever epidemic, Beijing, China, 2011. *Emerg Infect Dis* **19**, 909-915 (2013)

- 673 50 Brouwer, S., Lacey, J. A., You, Y., Davies, M. R. & Walker, M. J. Scarlet fever changes  
674 its spots. *Lancet Infect Dis* **19**, 1154-1155 (2019)
- 675 51 Brosnahan, A. J., Mantz, M. J., Squier, C. A., Peterson, M. L. & Schlievert, P. M.  
676 Cytolysins augment superantigen penetration of stratified mucosa. *J Immunol* **182**,  
677 2364-2373 (2009)
- 678 52 Veeravalli, K., Boyd, D., Iverson, B. L., Beckwith, J. & Georgiou, G. Laboratory  
679 evolution of glutathione biosynthesis reveals natural compensatory pathways. *Nat*  
680 *Chem Biol* **7**, 101-105 (2011)
- 681 53 Brenot, A., King, K. Y., Janowiak, B., Griffith, O. & Caparon, M. G. Contribution of  
682 glutathione peroxidase to the virulence of *Streptococcus pyogenes*. *Infect Immun* **72**,  
683 408-413 (2004)
- 684 54 Reniere, M. L. Reduce, induce, thrive: bacterial redox sensing during pathogenesis. *J*  
685 *Bacteriol* **200** pii: e00128-18 (2018)
- 686 55 Ku, J. W. & Gan, Y. H. Modulation of bacterial virulence and fitness by host  
687 glutathione. *Curr Opin Microbiol* **47**, 8-13 (2018)
- 688 56 Commons, R. *et al.* Superantigen genes in group A streptococcal isolates and their  
689 relationship with *emm* types. *J Med Microbiol* **57**, 1238-1246 (2008)
- 690 57 Chochua, S. *et al.* Emergent invasive group A *Streptococcus dysgalactiae* subsp.  
691 *equisimilis*, United States, 2015-2018. *Emerg Infect Dis* **25**, 1543-1547 (2019)
- 692 58 Barnett, T. C., Daw, J. N., Walker, M. J. & Brouwer, S. Genetic manipulation of group  
693 A *Streptococcus* – gene deletion by allelic replacement. In: T. Proft and J. Loh (Ed)  
694 *Group A Streptococcus: Methods and Protocols*. Springer, Heidelberg, **in press** (2020)
- 695 59 Love, M. I., Huber, W. & Anders, S. Moderated estimation of fold change and  
696 dispersion for RNA-seq data with DESeq2. *Genome Biol* **15**, 550 (2014)

- 697 60 Brouwer, S. *et al.* Endopeptidase PepO regulates the SpeB cysteine protease and is  
698 essential for the virulence of invasive MIT1 *Streptococcus pyogenes*. *J Bacteriol* **200**,  
699 pii: e00654-17 (2018)
- 700 61 Korczynska, J. E., Turkenburg, J. P. & Taylor, E. J. The structural characterization of  
701 a prophage-encoded extracellular DNase from *Streptococcus pyogenes*. *Nucleic Acids*  
702 *Res* **40**, 928-938 (2012)
- 703 62 Rivera-Hernandez, T. *et al.* Differing efficacies of lead group A streptococcal vaccine  
704 candidates and full-length M protein in cutaneous and invasive disease models. *mBio*  
705 **7**, pii: e00618-16 (2016)
- 706 63 Rahman, A. K. M. N. U. *et al.* Molecular basis of TCR selectivity, cross-reactivity, and  
707 allelic discrimination by a bacterial superantigen: integrative functional and energetic  
708 mapping of the SpeC-V beta 2.1 molecular interface. *J Immunol* **177**, 8595-8603 (2006)
- 709 64 National statement on ethical conduct in human research. *National Health and Medical*  
710 *Research Council, Canberra, Australia*, [https://www.nhmrc.gov.au/guidelines-](https://www.nhmrc.gov.au/guidelines-publications/e72)  
711 [publications/e72](https://www.nhmrc.gov.au/guidelines-publications/e72) (2015).
- 712 65 Palmer, M. The family of thiol-activated, cholesterol-binding cytolysins. *Toxicon* **39**,  
713 1681-1689 (2001)
- 714 66 Cywes Bentley, C., Hakansson, A., Christianson, J. & Wessels, M. R. Extracellular  
715 group A *Streptococcus* induces keratinocyte apoptosis by dysregulating calcium  
716 signalling. *Cell Microbiol* **7**, 945-955 (2005)
- 717

718 **Figures**

719 **Figure 1:**

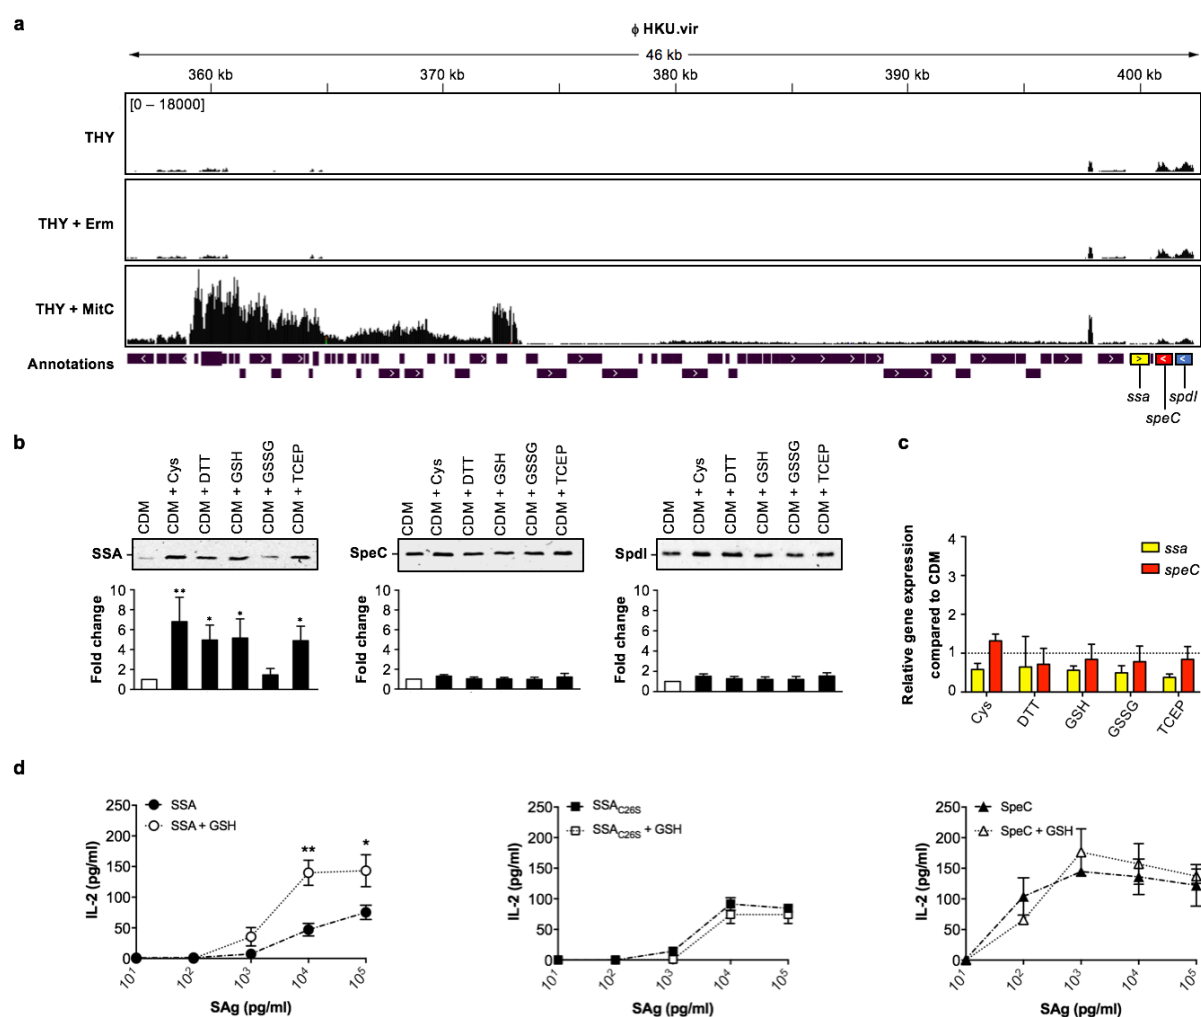

720

721 **Figure 1:** Post-transcriptional thiol-based regulation of SSA. (a) RNaseq expression profile

722 of ΦHKU.vir in the macrolide- and tetracycline-resistant GAS *emm12* isolate HKU16, grown

723 in THY broth with sub-inhibitory concentrations of erythromycin (Erm) and mitomycin C

724 (MitC). The plots illustrate the overall coverage distribution displaying the total number of

725 sequenced reads. The region that encodes exotoxin genes (*ssa* in yellow, *speC* in red and *spdI*

726 in blue) is indicated. (b) Immunoblot detection of SSA, SpeC and SpdI in culture supernatants

727 of HKU16 grown in a chemically defined medium (CDM) in the presence of various redox-

728 active compounds. Western blot signal intensities were quantified with ImageJ. Statistical

729 significance is displayed as \* $p < 0.01$  and \*\* $p < 0.001$  by one-way ANOVA ( $n = 4$ ). (c)



730 Quantitative real-time PCR of *ssa* and *speC* transcripts in HKU16 grown in CDM treated with  
731 2 mM of the indicated redox-active compounds. **(d)** Superantigen (SAg) activation of human  
732 PBMCs ( $2 \times 10^5$  cells per well) with SSA (circular), SSA<sub>C26S</sub> (square), and SpeC (triangular)  
733 at the indicated concentrations in absence (black; dash-dot line) or presence of 2 mM of GSH  
734 (white; dotted line), using human IL-2 as a readout. Bars represent the mean  $\pm$  SEM. Statistical  
735 significance is displayed as \* $p < 0.01$  and \*\* $p < 0.001$  by Student's t test.

736 **Figure 2:**

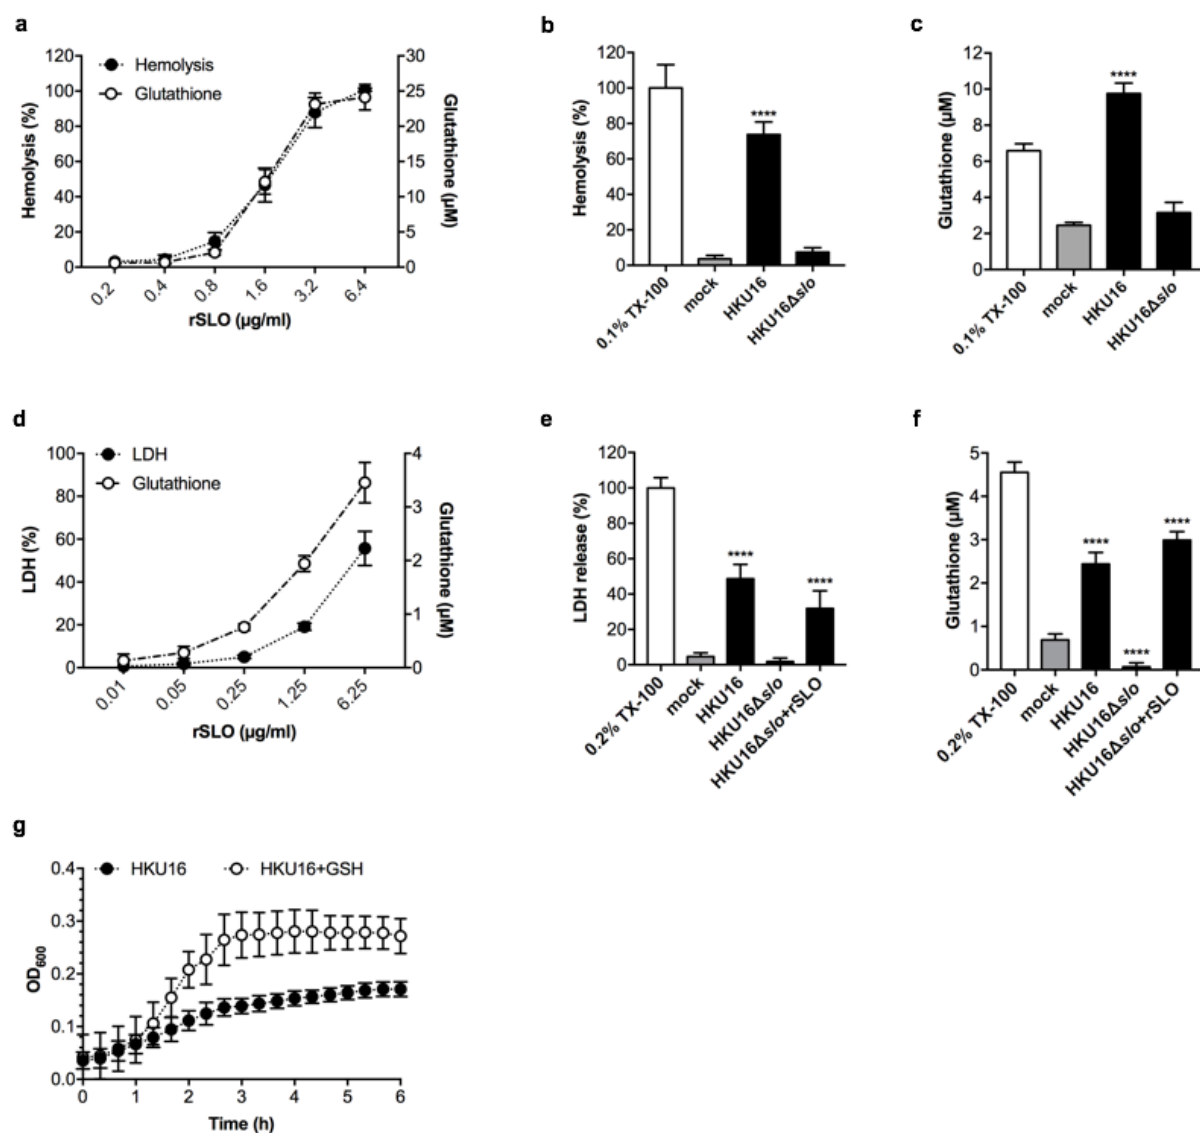

737

738 **Figure 2:** The cytotoxic activity of SLO causes the release of host cytosolic glutathione. (a)

739 Dose-dependent hemolytic activity of purified recombinant SLO (rSLO) in whole human blood

740 is accompanied by an extracellular accumulation of glutathione. Hemolysis is expressed as

741 percentage ± SD with respect to the positive control (cells treated with 0.1% Triton X-100 (TX-

742 100)). (b) Hemolytic activity of indicated HKU16 strains is expressed as percentage ± SD with

743 respect to the positive control (cells treated with 0.1% TX-100). Blood treated with HBSS

744 (mock) served as a negative control. (c) Extracellular accumulation of glutathione in blood

745 infected with indicated HKU16 strains. Blood treated with HBSS (mock) served as a negative

746 control. **(d)** Release of lactate dehydrogenase (LDH) (closed circles) and glutathione (open  
747 circles) by D562 cells treated with varying concentrations of recombinant SLO. The release of  
748 LDH and glutathione into the culture medium was assessed after 2 h of treatment. LDH release  
749 is expressed as percentage  $\pm$  SD with respect to the positive control (cells treated with 0.2%  
750 TX-100). Cells treated with growth medium (mock) served as a negative control. LDH **(e)** and  
751 glutathione **(f)** release by D562 cells challenged with indicated HKU16 strains at a multiplicity  
752 of infection of 20:1 (bacterial CFU:cells), assessed at 2 h post-infection. Where indicated, rSLO  
753 was added to HKU16 $\Delta$ *slo*-infected cells at a concentration of 6.25  $\mu$ g/ml. **(g)** Growth curves  
754 of HKU16 in D562 cell-free culture medium (EMEM + 10% FBS) supplemented with 2 mM  
755 of GSH. Statistical significance is displayed as \*\*\*\* $p$ <0.0001 by one-way ANOVA.

756 **Figure 3:**

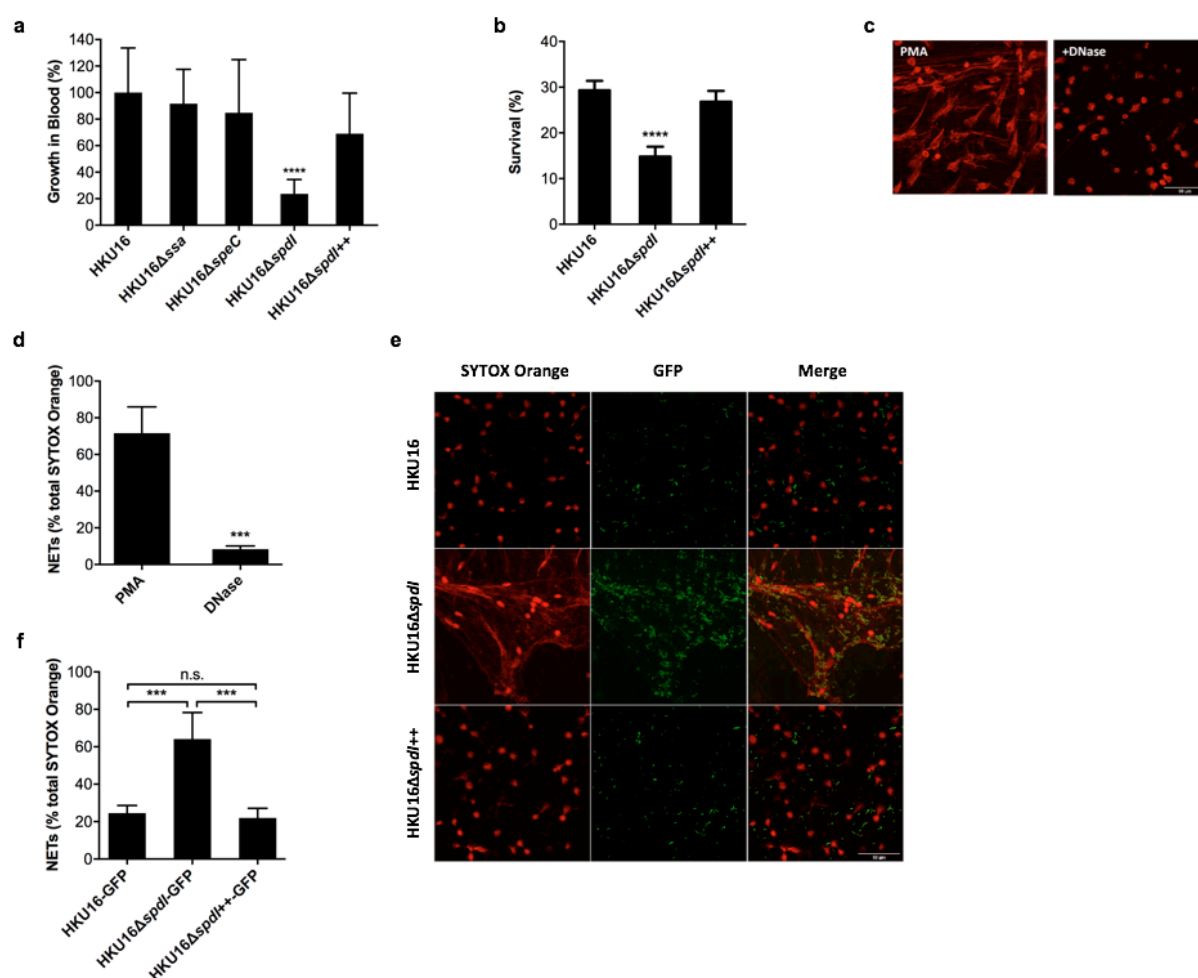

757

758 **Figure 3:** The ΦHKU.vir-encoded DNase Spd1 promotes resistance to neutrophil killing. (a)

759 Growth rate of indicated HKU16 strains in whole human blood. Statistical significance is

760 displayed as \*\*\*\* $p < 0.0001$  by one-way ANOVA (b) Human neutrophil killing assay. The data

761 represent means  $\pm$  SEM of six independent experiments. Statistical significance is displayed as

762 \*\*\*\* $p < 0.0001$  by one-way ANOVA (c) Purified human neutrophils were stimulated with 25

763 nM PMA for 3 h to induce neutrophil extracellular traps (NETs). NETs were detected using the

764 extracellular DNA stain SYTOX Orange (red) and images captured using confocal microscopy.

765 Panels show formation of NETs (left) and NET degradation following incubation with bovine

766 pancreatic DNase I as a positive control (right). (d) NET quantification of PMA-stimulated

767 neutrophils in the absence or presence of DNase I. Statistical significance is displayed as

768 \*\*\* $p < 0.001$  by Student's t-test. (e) Representative images of PMA-stimulated neutrophils

769 following infection with GFP fluorescent GAS (green) for 30 min at a multiplicity of infection  
770 of 10 (bacterial CFU:neutrophil). Scale bars represent 50  $\mu$ m. **(f)** NET quantification of PMA-  
771 stimulated neutrophils following incubation with GAS. NET quantification is expressed as a  
772 percentage of total SYTOX Orange stained area calculated from a minimum of five randomly  
773 selected microscopic fields. Error bars represent means  $\pm$  SEM from three independent  
774 experiments. Statistical significance is displayed as \*\*\* $p$ <0.001 by one-way ANOVA.

775 **Figure 4:**

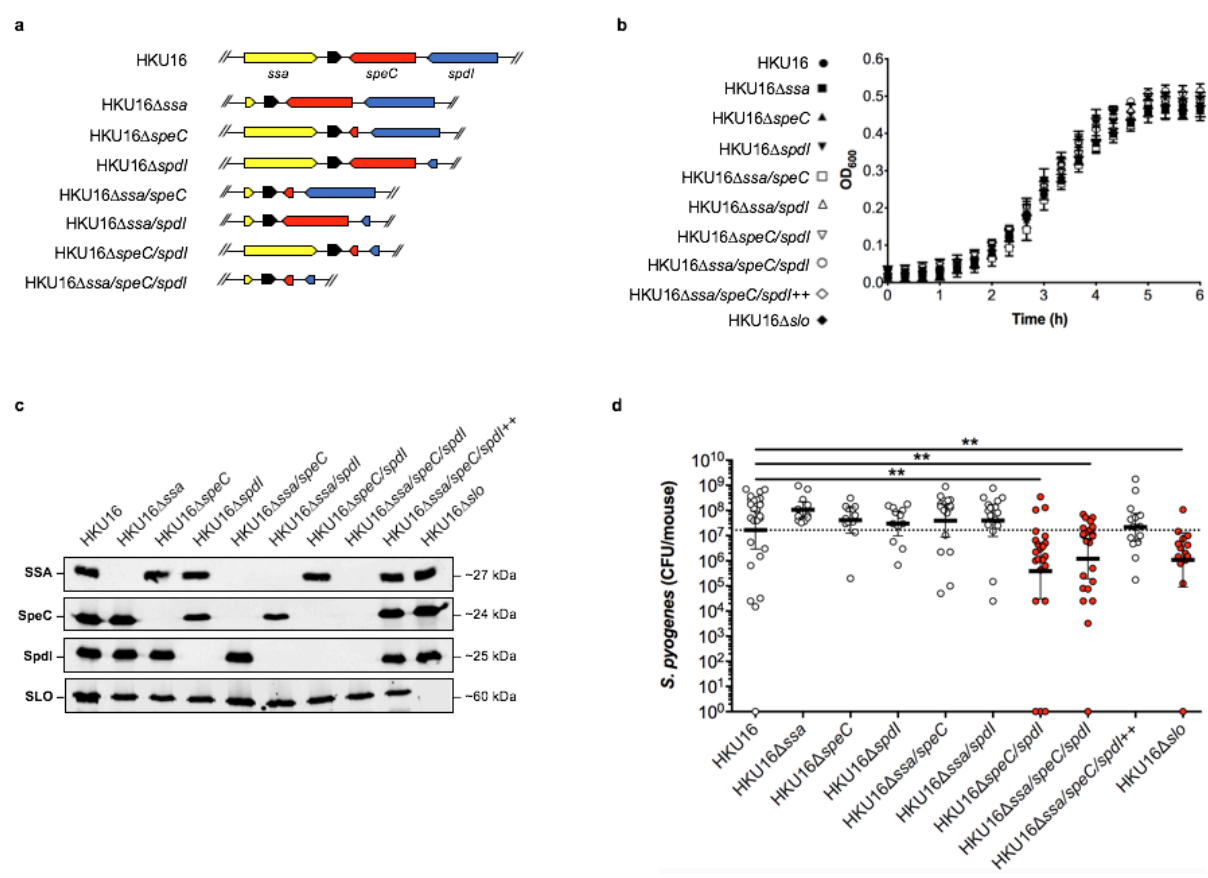

776

777 **Figure 4:** ΦHKU.vir-encoded exotoxins and SLO are critical for HKU16 nasopharyngeal  
 778 infection. (a) Illustration of the genetic in-frame deletions of ΦHKU.vir-encoded exotoxins in  
 779 HKU16 as described in Materials and Methods. (b) Growth curves of indicated HKU16 strains  
 780 in CDM. (c) Immunoblot detection of SSA, SpeC, Spd1 and SLO expression from indicated  
 781 HKU16 strains. The molecular mass of each protein (kDa) is indicated to the right. (d)  
 782 Individual ‘humanized’ B6 mice that express HLA-DR4, HLA-DQ8 and CD4 were nasally  
 783 inoculated with  $\sim 1 \times 10^8$  bacterial colony forming units (CFU) with indicated HKU16 strains  
 784 and nasopharyngeal CFUs were assessed at 48 h post-infection. Each symbol represents CFUs  
 785 from an individual mouse ( $n \geq 12$ ). Presented is the geometric mean with 95% confidence  
 786 interval. Significance was calculated using the Kruskal-Wallis test with the Dunn’s multiple  
 787 comparisons post-hoc test (\*\* $p < 0.001$ ).

788 **Figure 5:**

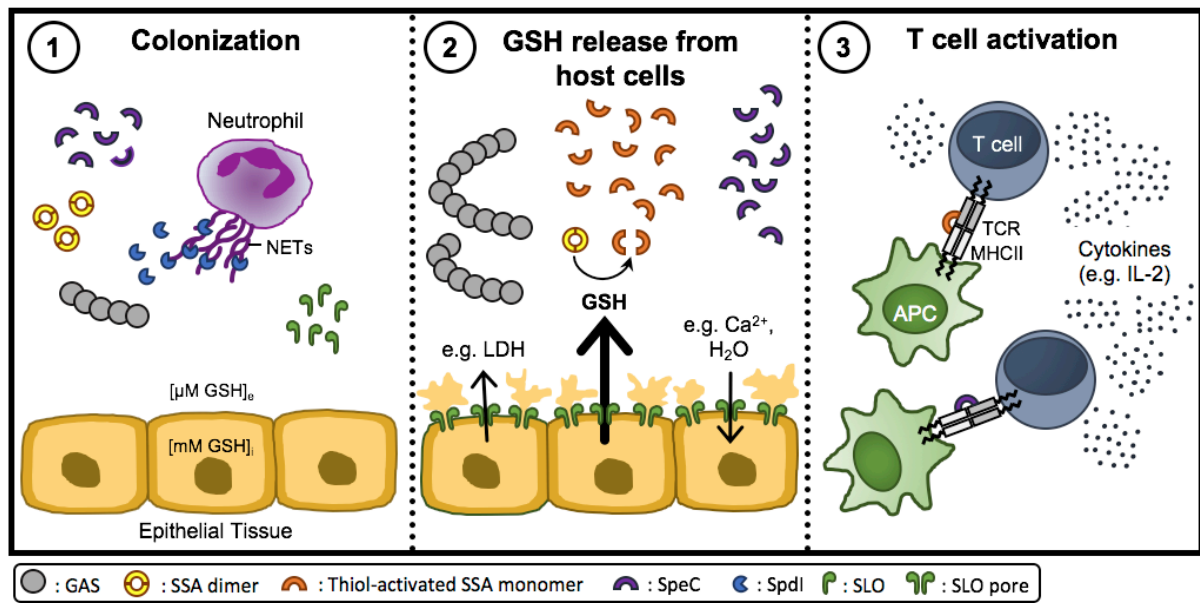

**Figure 5:** Proposed mechanistic model outlining inter-relationships between SLO mediated cytotoxicity towards epithelial cells and SSA superantigen potency. (1) During initial bacterial colonization, GAS secretes the DNase Spd1 to escape neutrophil clearance, allowing GAS to establish infection. (2) As infection progresses, SLO binds to host cell membranes and then oligomerizes to form large pores which induces the release of lactate dehydrogenase (LDH) and GSH from perforated host cells as well as cation influx<sup>65,66</sup>. In contrast to cations, glutathione exists at a much higher concentration in the intracellular compartment than the extracellular space (~1000-fold) causing a significant difference in redox potential across the plasma membrane of eukaryotic cells. This gradient makes the extracellular and intracellular areas, respectively, oxidative and reductive. GSH efflux from perforated cells serves as a stimulus for SSA release, reduces SSA dimers and activates SSA monomers. (3) Thiol-activated SSA, in conjunction with other superantigens like SpeC, then crosslinks major histocompatibility complex II molecules on antigen-presenting cells (APCs) and the variable region of the  $\beta$ -chain of T cell receptor (TCR) to induce an overwhelming T cell response with uncontrolled cytokine release.
